# Supplementary material for: Impact of Plant Protein Intakes on Nutrient Adequacy in the US
Source: MDPI journal article supplement (doi:10.3390/nu16081158), 2024-04-13
Supplement: s1 [file s1]

Supplementary Table S1. Participant flow chart

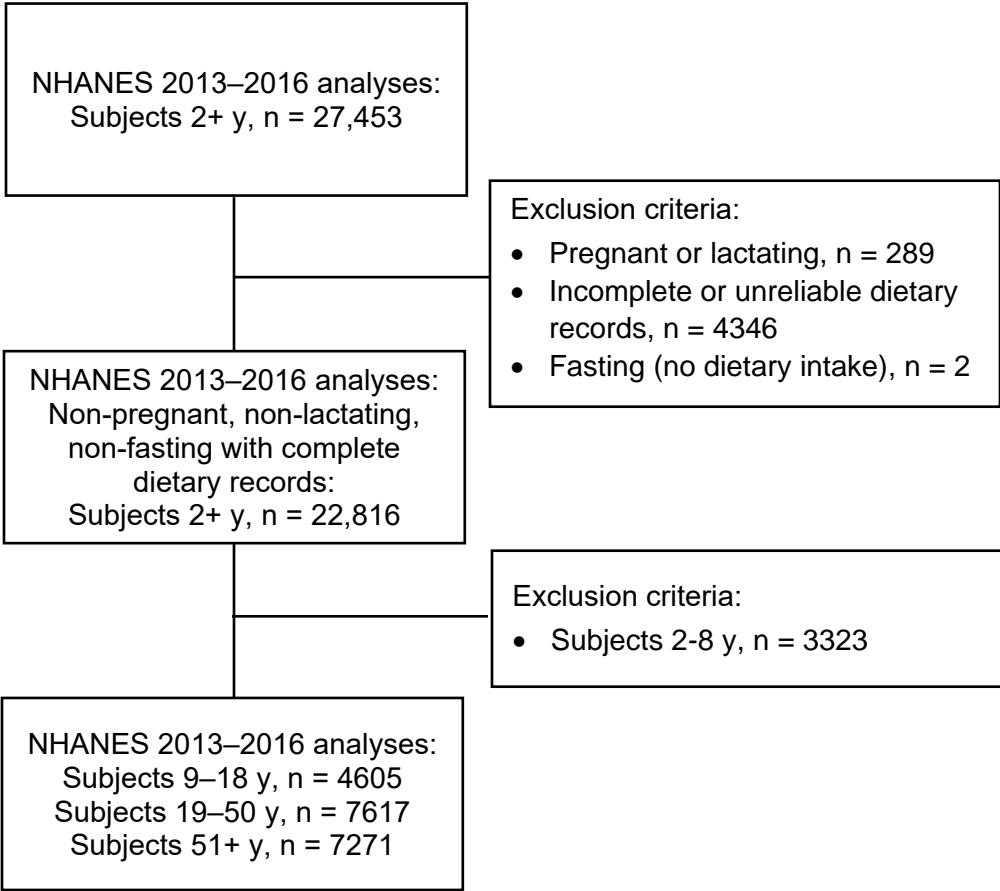

Supplementary Table S2. Percentage of adolescent age 9-18 years with nutrient intakes below Estimated Average Requirement (EAR) or above Adequate Intake (AI) across defined levels (DFL) of day 1 intake of plant protein, NHANES 2013-2018 data.

|                                 | Defined levels of day 1 intake of plant protein |                                 |                                 |                          | Group trend      |        |
|---------------------------------|-------------------------------------------------|---------------------------------|---------------------------------|--------------------------|------------------|--------|
|                                 | DFL 1<br>( $< 25\%$ )                           | DFL 2<br>( $25\%$ to $< 50\%$ ) | DFL 3<br>( $50\%$ to $< 75\%$ ) | DFL 4<br>( $\geq 75\%$ ) | Beta             | P      |
| Sample N                        | 1,251                                           | 2,623                           | 598                             | 133                      |                  |        |
| Population N                    | 11,566,057                                      | 23,513,743                      | 5,680,893                       | 1,353,083                |                  |        |
| Nutrients with EAR <sup>1</sup> | % Population with intakes below EAR             |                                 |                                 |                          |                  |        |
| Protein                         | 0.10 $\pm$ 0.07                                 | 0.81 $\pm$ 0.33*                | 11.2 $\pm$ 3.8*                 | 47.3 $\pm$ 11.7*         | 8.71 $\pm$ 5.47  | 0.2094 |
| Calcium                         | 62.1 $\pm$ 2.7                                  | 61.2 $\pm$ 2.1                  | 83.8 $\pm$ 3.5*                 | 99.2 $\pm$ 1.4*          | 10.3 $\pm$ 5.5   | 0.1558 |
| Copper                          | 16.3 $\pm$ 2.0                                  | 6.74 $\pm$ 1.08*                | 6.73 $\pm$ 2.77*                | 20.4 $\pm$ 5.4           | -3.04 $\pm$ 3.87 | 0.4894 |
| Folate, DFE                     | 22.4 $\pm$ 3.1                                  | 4.50 $\pm$ 0.99*                | 9.37 $\pm$ 3.57*                | 8.46 $\pm$ 4.96*         | -6.90 $\pm$ 5.36 | 0.2882 |
| Iron                            | 8.63 $\pm$ 1.22                                 | 3.55 $\pm$ 0.51*                | 7.28 $\pm$ 2.49                 | 10.4 $\pm$ 2.3           | -0.64 $\pm$ 2.19 | 0.7872 |
| Magnesium                       | 66.6 $\pm$ 2.1                                  | 55.6 $\pm$ 1.8*                 | 52.3 $\pm$ 4.1*                 | 76.0 $\pm$ 8.8           | -3.89 $\pm$ 5.27 | 0.5140 |
| Niacin                          | 0.24 $\pm$ 0.22                                 | 0.32 $\pm$ 0.17                 | 6.55 $\pm$ 2.94*                | 14.7 $\pm$ 4.7*          | 3.45 $\pm$ 1.72  | 0.1384 |
| Riboflavin                      | 1.51 $\pm$ 0.54                                 | 1.12 $\pm$ 0.38                 | 9.42 $\pm$ 3.07*                | 26.2 $\pm$ 6.5*          | 5.06 $\pm$ 3.04  | 0.1950 |
| Selenium                        | 0.04 $\pm$ 0.04                                 | 0.14 $\pm$ 0.12                 | 2.87 $\pm$ 2.37                 | 10.8 $\pm$ 6.0           | 2.06 $\pm$ 1.25  | 0.1971 |
| Thiamin                         | 7.61 $\pm$ 1.66                                 | 1.65 $\pm$ 0.45*                | 4.82 $\pm$ 2.55                 | 6.86 $\pm$ 3.34          | -1.42 $\pm$ 2.23 | 0.5696 |
| Vitamin A, RE                   | 38.9 $\pm$ 2.6                                  | 32.5 $\pm$ 2.3                  | 54.0 $\pm$ 3.8*                 | 82.8 $\pm$ 5.9*          | 8.77 $\pm$ 7.67  | 0.3357 |
| Vitamin B <sub>12</sub>         | 0.66 $\pm$ 0.30                                 | 1.31 $\pm$ 0.47                 | 21.0 $\pm$ 4.6*                 | 65.3 $\pm$ 12.2*         | 13.3 $\pm$ 7.4   | 0.1700 |
| Vitamin B <sub>6</sub>          | 1.27 $\pm$ 0.70                                 | 2.95 $\pm$ 0.84                 | 17.0 $\pm$ 3.5*                 | 36.1 $\pm$ 10.4*         | 8.60 $\pm$ 3.58  | 0.0956 |
| Vitamin C                       | 45.8 $\pm$ 2.8                                  | 34.2 $\pm$ 2.1*                 | 32.1 $\pm$ 4.8*                 | 57.4 $\pm$ 14.2          | -3.50 $\pm$ 5.66 | 0.5796 |
| Vitamin D                       | 87.2 $\pm$ 1.8                                  | 97.4 $\pm$ 0.6*                 | 99.9 $\pm$ 0.1*                 | 99.6 $\pm$ 0.6*          | 5.92 $\pm$ 2.18  | 0.0726 |
| Vitamin E, ATE                  | 94.8 $\pm$ 1.8                                  | 81.0 $\pm$ 1.9*                 | 68.2 $\pm$ 4.2*                 | 79.2 $\pm$ 8.0           | -10.5 $\pm$ 3.6  | 0.0631 |
| Zinc                            | 10.7 $\pm$ 2.2                                  | 16.2 $\pm$ 2.2                  | 39.4 $\pm$ 4.9*                 | 80.5 $\pm$ 8.1*          | 16.7 $\pm$ 6.3   | 0.0764 |
| Nutrients with AI <sup>2</sup>  | % Population with intakes above AI              |                                 |                                 |                          |                  |        |
| Dietary fiber                   | 0.01 $\pm$ 0.01                                 | 0.33 $\pm$ 0.13*                | 5.80 $\pm$ 1.98*                | 6.65 $\pm$ 3.52          | 2.41 $\pm$ 1.10  | 0.1168 |
| Potassium                       | 31.3 $\pm$ 3.6                                  | 23.8 $\pm$ 2.0                  | 17.7 $\pm$ 3.5*                 | 1.57 $\pm$ 2.11*         | -7.97 $\pm$ 1.31 | 0.0089 |
| Sodium                          | 99.8 $\pm$ 0.2                                  | 99.8 $\pm$ 0.1                  | 97.8 $\pm$ 1.8                  | 100 $\pm$ 6              | -0.52 $\pm$ 0.58 | 0.4341 |
| Vitamin K                       | 38.6 $\pm$ 3.4                                  | 54.5 $\pm$ 2.6*                 | 49.9 $\pm$ 5.2                  | 29.4 $\pm$ 12.1          | 3.52 $\pm$ 6.72  | 0.6363 |
| Choline                         | 15.1 $\pm$ 2.2                                  | 2.81 $\pm$ 0.56*                | 0.30 $\pm$ 0.40*                | 0.00 $\pm$ 0.02*         | -7.01 $\pm$ 2.66 | 0.0777 |

Data are presented as Mean  $\pm$  SE. \*significant differences from quartile 1 at  $P < 0.05$ . <sup>1</sup>EAR is the average daily intake of a nutrient to meet the requirements of 50% of healthy individuals. <sup>2</sup>AI is the intake level assumed to ensure nutritional adequacy when insufficient data was available to establish a Recommended Daily Allowance. Abbreviations: AI, adequate intake; ATE, alpha-tocopherol equivalents; DFE, dietary folate equivalents; EAR, estimated average requirement; RE, retinol equivalents.

Supplementary Table S3. Percentage of adults age 19-50 years with nutrient intakes below Estimated Average Requirement (EAR) or above Adequate Intake (AI) across defined levels (DFL) of day 1 intake of plant protein, NHANES 2013-2018 data.

|                                 | Defined levels of day 1 intake of plant protein |                                 |                                 |                          | Group Trend      |        |
|---------------------------------|-------------------------------------------------|---------------------------------|---------------------------------|--------------------------|------------------|--------|
|                                 | DFL 1<br>( $< 25\%$ )                           | DFL 2<br>( $25\%$ to $< 50\%$ ) | DFL 3<br>( $50\%$ to $< 75\%$ ) | DFL 4<br>( $\geq 75\%$ ) | Beta             | P      |
| Sample N                        | 2,404                                           | 4,081                           | 877                             | 255                      |                  |        |
| Population N                    | 38,930,873                                      | 69,362,234                      | 14,982,336                      | 3,765,714                |                  |        |
| Nutrients with EAR <sup>1</sup> | % Population with intakes below EAR             |                                 |                                 |                          |                  |        |
| Protein                         | 0.17 $\pm$ 0.10                                 | 1.34 $\pm$ 0.33*                | 11.7 $\pm$ 2.6*                 | 33.1 $\pm$ 15.6*         | 7.20 $\pm$ 3.54  | 0.1351 |
| Calcium                         | 33.2 $\pm$ 1.8                                  | 26.5 $\pm$ 1.4*                 | 44.9 $\pm$ 2.4*                 | 59.2 $\pm$ 12.3*         | 5.33 $\pm$ 5.78  | 0.4244 |
| Copper                          | 13.4 $\pm$ 1.3                                  | 6.33 $\pm$ 0.69*                | 5.87 $\pm$ 1.37*                | 7.76 $\pm$ 4.02          | -3.47 $\pm$ 1.87 | 0.1603 |
| Folate, DFE                     | 28.6 $\pm$ 2.3                                  | 7.96 $\pm$ 1.27*                | 8.19 $\pm$ 2.30*                | 4.47 $\pm$ 6.45*         | -10.7 $\pm$ 4.8  | 0.1101 |
| Iron                            | 12.7 $\pm$ 0.8                                  | 7.91 $\pm$ 0.44*                | 9.99 $\pm$ 1.62                 | 11.5 $\pm$ 3.1           | -1.45 $\pm$ 1.64 | 0.4424 |
| Magnesium                       | 61.5 $\pm$ 2.1                                  | 49.5 $\pm$ 1.3*                 | 38.9 $\pm$ 2.3*                 | 35.5 $\pm$ 11.1*         | -10.3 $\pm$ 1.3  | 0.0044 |
| Niacin                          | 0.92 $\pm$ 0.37                                 | 0.86 $\pm$ 0.23                 | 3.19 $\pm$ 2.30                 | 9.69 $\pm$ 6.90          | 1.68 $\pm$ 1.10  | 0.2226 |
| Riboflavin                      | 3.65 $\pm$ 0.71                                 | 3.43 $\pm$ 0.58                 | 6.19 $\pm$ 1.76                 | 15.6 $\pm$ 5.8*          | 2.14 $\pm$ 1.57  | 0.2662 |
| Selenium                        | 0.08 $\pm$ 0.06                                 | 0.33 $\pm$ 0.12                 | 3.69 $\pm$ 1.74*                | 20.6 $\pm$ 6.3*          | 3.58 $\pm$ 2.60  | 0.2630 |
| Thiamin                         | 13.0 $\pm$ 1.7                                  | 3.96 $\pm$ 0.65*                | 6.67 $\pm$ 2.28*                | 5.31 $\pm$ 5.77          | -3.70 $\pm$ 2.55 | 0.2428 |
| Vitamin A, RE                   | 45.8 $\pm$ 2.2                                  | 47.3 $\pm$ 1.7                  | 53.9 $\pm$ 3.3*                 | 48.1 $\pm$ 11.4          | 2.44 $\pm$ 1.51  | 0.2042 |
| Vitamin B <sub>12</sub>         | 0.93 $\pm$ 0.47                                 | 3.50 $\pm$ 0.88*                | 23.9 $\pm$ 4.3*                 | 59.3 $\pm$ 8.1*          | 13.4 $\pm$ 6.0   | 0.1128 |
| Vitamin B <sub>6</sub>          | 4.48 $\pm$ 1.25                                 | 6.85 $\pm$ 0.98                 | 12.0 $\pm$ 4.6                  | 14.5 $\pm$ 6.0           | 3.41 $\pm$ 0.54  | 0.0079 |
| Vitamin C                       | 60.3 $\pm$ 2.1                                  | 47.5 $\pm$ 1.6*                 | 35.6 $\pm$ 4.8*                 | 31.0 $\pm$ 6.8*          | -11.4 $\pm$ 1.3  | 0.0029 |
| Vitamin D                       | 87.5 $\pm$ 2.1                                  | 96.8 $\pm$ 0.6*                 | 98.5 $\pm$ 0.6*                 | 99.3 $\pm$ 0.7*          | 5.38 $\pm$ 1.95  | 0.0701 |
| Vitamin E, ATE                  | 86.1 $\pm$ 2.0                                  | 74.6 $\pm$ 1.7*                 | 63.7 $\pm$ 3.4*                 | 61.7 $\pm$ 7.3*          | -10.1 $\pm$ 1.5  | 0.0063 |
| Zinc                            | 7.76 $\pm$ 1.33                                 | 15.6 $\pm$ 1.2*                 | 37.8 $\pm$ 3.1*                 | 62.9 $\pm$ 13.4*         | 15.4 $\pm$ 3.8   | 0.0275 |
| Nutrients with AI <sup>2</sup>  | % Population with intakes above AI              |                                 |                                 |                          |                  |        |
| Dietary fiber                   | 0.17 $\pm$ 0.09                                 | 4.19 $\pm$ 0.60*                | 17.3 $\pm$ 2.4*                 | 35.4 $\pm$ 5.8*          | 9.21 $\pm$ 2.76  | 0.0446 |
| Potassium                       | 12.6 $\pm$ 4.2                                  | 14.5 $\pm$ 6.0                  | 0.00 $\pm$ 6.45                 | 8.54 $\pm$ 17.12         | -3.30 $\pm$ 3.33 | 0.3949 |
| Sodium                          | 99.6 $\pm$ 0.2                                  | 99.6 $\pm$ 0.1                  | 99.7 $\pm$ 3.7                  | 100 $\pm$ 3              | 0.07 $\pm$ 0.05  | 0.2327 |
| Vitamin K                       | 43.9 $\pm$ 2.8                                  | 50.4 $\pm$ 2.4                  | 54.7 $\pm$ 4.9                  | 65.1 $\pm$ 10.0*         | 6.20 $\pm$ 0.74  | 0.0036 |
| Choline                         | 26.4 $\pm$ 2.1                                  | 7.58 $\pm$ 1.00*                | 1.49 $\pm$ 0.58*                | 0.01 $\pm$ 0.06*         | -11.8 $\pm$ 3.6  | 0.0456 |

Data are presented as Mean  $\pm$  SE. \*significant differences from quartile 1 at  $P < 0.05$ . <sup>1</sup>EAR is the average daily intake of a nutrient to meet the requirements of 50% of healthy individuals. <sup>2</sup>AI is the intake level assumed to ensure nutritional adequacy when insufficient data was available to establish a Recommended Daily Allowance. Abbreviations: AI, adequate intake; ATE, alpha-tocopherol equivalents; DFE, dietary folate equivalents; EAR, estimated average requirement; RE, retinol equivalents.

Supplementary Table S4. Percentage of adults age 51+ years with nutrient intakes below Estimated Average Requirement (EAR) or above Adequate Intake (AI) across defined levels (DFL) of day 1 intake of plant protein, NHANES 2013-2018 data.

|                                 | Defined levels of day 1 intake of plant protein |                         |                         |                  | Group Trend  |        |
|---------------------------------|-------------------------------------------------|-------------------------|-------------------------|------------------|--------------|--------|
|                                 | DFL 1<br>(< 25%)                                | DFL 2<br>(25% to < 50%) | DFL 3<br>(50% to < 75%) | DFL 4<br>(≥ 75%) | Beta         | P      |
| Sample N                        | 1,902                                           | 4,016                   | 1,092                   | 261              |              |        |
| Population N                    | 27,705,336                                      | 60,712,458              | 14,677,191              | 3,308,016        |              |        |
| Nutrients with EAR <sup>1</sup> | % Population with intakes below EAR             |                         |                         |                  |              |        |
| Protein                         | 0.34 ± 0.23                                     | 2.65 ± 0.49*            | 11.4 ± 2.1*             | 50.4 ± 8.4*      | 9.84 ± 5.82  | 0.1895 |
| Calcium                         | 54.8 ± 2.4                                      | 56.8 ± 1.9              | 71.7 ± 2.5*             | 90.3 ± 3.5*      | 9.53 ± 3.54  | 0.0743 |
| Copper                          | 12.4 ± 2.1                                      | 7.80 ± 0.84*            | 5.18 ± 1.21*            | 12.1 ± 4.2       | -2.27 ± 1.83 | 0.3030 |
| Folate, DFE                     | 36.3 ± 2.7                                      | 13.6 ± 1.2*             | 5.69 ± 1.90*            | 16.3 ± 5.1*      | -12.2 ± 5.8  | 0.1271 |
| Iron                            | 3.31 ± 0.89                                     | 1.01 ± 0.25*            | 0.33 ± 0.25*            | 4.46 ± 2.25      | -0.78 ± 1.04 | 0.5070 |
| Magnesium                       | 67.2 ± 2.3                                      | 55.4 ± 1.7*             | 44.0 ± 2.7*             | 47.1 ± 5.9*      | -9.69 ± 2.36 | 0.0260 |
| Niacin                          | 1.71 ± 0.84                                     | 2.20 ± 0.41             | 3.70 ± 1.23             | 17.7 ± 5.9*      | 2.70 ± 2.13  | 0.2953 |
| Riboflavin                      | 2.51 ± 0.73                                     | 2.58 ± 0.41             | 6.56 ± 1.00*            | 26.1 ± 5.6*      | 4.26 ± 3.10  | 0.2630 |
| Selenium                        | 0.17 ± 0.15                                     | 0.53 ± 0.19             | 2.83 ± 1.13*            | 30.5 ± 12.4*     | 4.78 ± 4.31  | 0.3481 |
| Thiamin                         | 16.6 ± 2.1                                      | 7.41 ± 1.01*            | 4.78 ± 1.13*            | 23.2 ± 5.8       | -2.83 ± 4.44 | 0.5696 |
| Vitamin A, RE                   | 32.4 ± 2.9                                      | 42.1 ± 2.4*             | 55.1 ± 3.2*             | 64.7 ± 6.3*      | 11.0 ± 0.7   | 0.0005 |
| Vitamin B <sub>12</sub>         | 0.99 ± 0.63                                     | 3.46 ± 0.95*            | 28.3 ± 3.6*             | 79.6 ± 8.9*      | 18.2 ± 8.6   | 0.1237 |
| Vitamin B <sub>6</sub>          | 11.8 ± 2.5                                      | 21.6 ± 1.7*             | 28.4 ± 3.2*             | 49.7 ± 7.1*      | 10.1 ± 2.0   | 0.0148 |
| Vitamin C                       | 55.4 ± 2.6                                      | 45.9 ± 1.9*             | 44.2 ± 3.3*             | 45.5 ± 5.9       | -4.84 ± 2.24 | 0.1195 |
| Vitamin D                       | 87.1 ± 2.4                                      | 97.2 ± 0.6*             | 99.0 ± 0.5*             | 99.8 ± 0.2*      | 5.46 ± 2.13  | 0.0827 |
| Vitamin E, ATE                  | 85.5 ± 1.9                                      | 81.6 ± 1.5              | 70.5 ± 2.8*             | 76.6 ± 7.0       | -5.56 ± 2.28 | 0.0929 |
| Zinc                            | 12.5 ± 1.9                                      | 22.0 ± 1.6*             | 37.6 ± 2.9*             | 64.6 ± 6.8*      | 14.3 ± 2.9   | 0.0161 |
| Nutrients with AI <sup>2</sup>  | % Population with intakes above AI              |                         |                         |                  |              |        |
| Dietary fiber                   | 1.67 ± 0.63                                     | 12.6 ± 1.2*             | 34.0 ± 3.0*             | 35.5 ± 5.1*      | 14.0 ± 2.7   | 0.0146 |
| Potassium                       | 31.9 ± 2.2                                      | 31.5 ± 1.4              | 28.6 ± 2.2              | 18.5 ± 5.1*      | -2.73 ± 1.55 | 0.1765 |
| Sodium                          | 98.8 ± 0.5                                      | 98.7 ± 0.4              | 98.1 ± 0.7              | 94.1 ± 10.0      | -0.82 ± 0.63 | 0.2826 |
| Vitamin K                       | 49.7 ± 3.2                                      | 54.2 ± 2.4              | 49.3 ± 3.1              | 53.3 ± 10.2      | 0.52 ± 1.92  | 0.8046 |
| Choline                         | 21.3 ± 2.5                                      | 5.12 ± 0.88*            | 0.63 ± 0.31*            | 0.35 ± 0.47*     | -9.25 ± 3.30 | 0.0676 |

Data are presented as Mean ± SE. \*significant differences from quartile 1 at P<0.05. <sup>1</sup>EAR is the average daily intake of a nutrient to meet the requirements of 50% of healthy individuals. <sup>2</sup>AI is the intake level assumed to ensure nutritional adequacy when insufficient data was available to establish a Recommended Daily Allowance. Abbreviations: AI, adequate intake; ATE, alpha-tocopherol equivalents; DFE, dietary folate equivalents; EAR, estimated average requirement; RE, retinol equivalents.
